# Supplementary material for: Understanding the antifouling mechanisms related to copper oxide and zinc oxide nanoparticles in anaerobic membrane bioreactors
Source: Royal Society of Chemistry journal article supplement (doi:10.1039/c9en00872a), 2019-01-01
Supplement: c9en00872a2.xlsx [file c9en00872a2.xlsx]

## Sheet: KO03070
Pathway	KO03070
Description	Gram-negative bacteria secrete a wide range of proteins whose functions include biogenesis of organelles, such as pilli and flagella, nutrient acquisition, virulence, and efflux of drugs and other toxins. Six distinct secretion systems have been shown to mediate protein export through the inner and outer membranes of Gram-negative bacteria. These pathways are highly conserved throughout the Gram-…
Genes	K02452: gspC; general secretion pathway protein C
	K02453: gspD; general secretion pathway protein D
	K02454: gspE; general secretion pathway protein E [EC:7.4.2.8]
	K02455: gspF; general secretion pathway protein F
	K02456: gspG; general secretion pathway protein G
	K02457: gspH; general secretion pathway protein H
	K02458: gspI; general secretion pathway protein I
	K02459: gspJ; general secretion pathway protein J
	K02460: gspK; general secretion pathway protein K
	K02461: gspL; general secretion pathway protein L
	K02462: gspM; general secretion pathway protein M
	K02464: gspO; general secretion pathway protein O [EC:3.4.23.43 2.1.1.-]
	K02465: gspS; general secretion pathway protein S
	K03070: secA; preprotein translocase subunit SecA [EC:7.4.2.8]
	K03071: secB; preprotein translocase subunit SecB
	K03072: secD; preprotein translocase subunit SecD
	K03073: secE; preprotein translocase subunit SecE
	K03074: secF; preprotein translocase subunit SecF
	K03075: secG; preprotein translocase subunit SecG
	K03076: secY; preprotein translocase subunit SecY
	K03106: SRP54, ffh; signal recognition particle subunit SRP54 [EC:3.6.5.4]
	K03110: ftsY; fused signal recognition particle receptor
	K03116: tatA; sec-independent protein translocase protein TatA
	K03117: tatB; sec-independent protein translocase protein TatB
	K03118: tatC; sec-independent protein translocase protein TatC
	K03194: virB1; type IV secretion system protein VirB1
	K03195: virB10, lvhB10; type IV secretion system protein VirB10
	K03196: virB11, lvhB11; type IV secretion system protein VirB11 [EC:7.4.2.8]
	K03197: virB2, lvhB2; type IV secretion system protein VirB2
	K03198: virB3, lvhB3; type IV secretion system protein VirB3
	K03199: virB4, lvhB4; type IV secretion system protein VirB4 [EC:7.4.2.8]
	K03200: virB5, lvhB5; type IV secretion system protein VirB5
	K03201: virB6, lvhB6; type IV secretion system protein VirB6
	K03202: virB7, lvhB7; type IV secretion system protein VirB7
	K03203: virB8, lvhB8; type IV secretion system protein VirB8
	K03204: virB9, lvhB9; type IV secretion system protein VirB9
	K03205: virD4, lvhD4; type IV secretion system protein VirD4 [EC:7.4.2.8]
	K03210: yajC; preprotein translocase subunit YajC
	K03217: yidC, spoIIIJ, OXA1, ccfA; YidC/Oxa1 family membrane protein insertase
	K03219: yscC, sctC, ssaC; type III secretion protein C
	K03221: yscF, sctF, ssaG, prgI; type III secretion protein F
	K03222: yscJ, sctJ, hrcJ, ssaJ; type III secretion protein J
	K03223: yscL, sctL; type III secretion protein L
	K03224: yscN, sctN, hrcN, ssaN; ATP synthase in type III secretion protein N [EC:7.4.2.8]
	K03225: yscQ, sctQ, hrcQ, ssaQ, spaO; type III secretion protein Q
	K03226: yscR, sctR, hrcR, ssaR; type III secretion protein R
	K03227: yscS, sctS, hrcS, ssaS; type III secretion protein S
	K03228: yscT, sctT, hrcT, ssaT; type III secretion protein T
	K03229: yscU, sctU, hrcU, ssaU; type III secretion protein U
	K03230: yscV, sctV, hrcV, ssaV, invA; type III secretion protein V
	K03425: tatE; sec-independent protein translocase protein TatE
	K04056: yscO, sctO; type III secretion protein O
	K04057: yscP, sctP; type III secretion protein P
	K04058: yscW, sctW; type III secretion protein W
	K04059: yscX, sctX; type III secretion protein X
	K11003: hlyD, cyaD; hemolysin D
	K11004: hlyB, cyaB; ATP-binding cassette, subfamily B, bacterial HlyB/CyaB
	K11016: shlA, hhdA, hpmA; hemolysin
	K11017: shlB, hhdB, hpmB; hemolysin activation/secretion protein
	K11028: vacA; vacuolating cytotoxin
	K11891: impL, vasK, icmF; type VI secretion system protein ImpL
	K11892: impK, ompA, vasF, dotU; type VI secretion system protein ImpK
	K11903: hcp; type VI secretion system secreted protein Hcp
	K11904: vgrG; type VI secretion system secreted protein VgrG
	K11906: vasD, lip; type VI secretion system protein VasD
	K11907: vasG, clpV; type VI secretion system protein VasG
	K11912: ppkA; serine/threonine-protein kinase PpkA [EC:2.7.11.1]
	K11913: fha1; type VI secretion system protein
	K11915: stp1, pppA; serine/threonine protein phosphatase Stp1 [EC:3.1.3.16]
	K12257: secDF; SecD/SecF fusion protein
	K12340: tolC; outer membrane protein
	K12341: yadA; adhesin YadA
	K12342: yadB_C; adhesin YadB/C
	K13301: secM; secretion monitor

## Sheet: KO02024
Pathway	KO02024
Description	Quorum sensing (QS) is a regulatory system that allows bacteria to share information about cell density and adjust gene expression accordingly. All QS bacteria produce and release chemical signal molecules called autoinducers (AIs) that increase in concentration as a function of cell density. The most commonly studied AIs belong to one of the following three categories: acylated homoserine lacton…
Genes	K00494: luxA; alkanal monooxygenase alpha chain [EC:1.14.14.3]
	K01114: plc; phospholipase C [EC:3.1.4.3]
	K01218: gmuG; mannan endo-1,4-beta-mannosidase [EC:3.2.1.78]
	K01318: sspA; glutamyl endopeptidase [EC:3.4.21.19]
	K01364: speB; streptopain [EC:3.4.22.10]
	K01399: lasB; pseudolysin [EC:3.4.24.26]
	K01497: ribA, RIB1; GTP cyclohydrolase II [EC:3.5.4.25]
	K01580: E4.1.1.15, gadB, gadA, GAD; glutamate decarboxylase [EC:4.1.1.15]
	K01626: E2.5.1.54, aroF, aroG, aroH; 3-deoxy-7-phosphoheptulonate synthase [EC:2.5.1.54]
	K01635: lacD; tagatose 1,6-diphosphate aldolase [EC:4.1.2.40]
	K01657: trpE; anthranilate synthase component I [EC:4.1.3.27]
	K01658: trpG; anthranilate synthase component II [EC:4.1.3.27]
	K01728: pel; pectate lyase [EC:4.2.2.2]
	K01897: ACSL, fadD; long-chain acyl-CoA synthetase [EC:6.2.1.3]
	K01995: livG; branched-chain amino acid transport system ATP-binding protein
	K01996: livF; branched-chain amino acid transport system ATP-binding protein
	K01997: livH; branched-chain amino acid transport system permease protein
	K01998: livM; branched-chain amino acid transport system permease protein
	K01999: livK; branched-chain amino acid transport system substrate-binding protein
	K02031: ABC.PE.A; peptide/nickel transport system ATP-binding protein
	K02032: ABC.PE.A1; peptide/nickel transport system ATP-binding protein
	K02033: ABC.PE.P; peptide/nickel transport system permease protein
	K02034: ABC.PE.P1; peptide/nickel transport system permease protein
	K02035: ABC.PE.S; peptide/nickel transport system substrate-binding protein
	K02052: ABC.SP.A; putative spermidine/putrescine transport system ATP-binding protein
	K02053: ABC.SP.P; putative spermidine/putrescine transport system permease protein
	K02054: ABC.SP.P1; putative spermidine/putrescine transport system permease protein
	K02055: ABC.SP.S; putative spermidine/putrescine transport system substrate-binding protein
	K02250: comK; competence protein ComK
	K02251: comQ; competence protein ComQ
	K02252: comS; competence protein ComS
	K02253: comX; competence protein ComX
	K02402: flhC; flagellar transcriptional activator FlhC
	K02403: flhD; flagellar transcriptional activator FlhD
	K02490: spo0F; two-component system, response regulator, stage 0 sporulation protein F
	K03070: secA; preprotein translocase subunit SecA [EC:7.4.2.8]
	K03071: secB; preprotein translocase subunit SecB
	K03073: secE; preprotein translocase subunit SecE
	K03075: secG; preprotein translocase subunit SecG
	K03076: secY; preprotein translocase subunit SecY
	K03106: SRP54, ffh; signal recognition particle subunit SRP54 [EC:3.6.5.4]
	K03110: ftsY; fused signal recognition particle receptor
	K03210: yajC; preprotein translocase subunit YajC
	K03217: yidC, spoIIIJ, OXA1, ccfA; YidC/Oxa1 family membrane protein insertase
	K03400: luxC; long-chain-fatty-acyl-CoA reductase [EC:1.2.1.50]
	K03666: hfq; host factor-I protein
	K06046: luxE; long-chain-fatty-acid---luciferin-component ligase [EC:6.2.1.19]
	K06352: phrA; phosphatase RapA inhibitor
	K06353: phrC; phosphatase RapC regulator
	K06354: phrE; phosphatase RapE regulator
	K06355: phrF; phosphatase RapF regulator
	K06356: phrG; phosphatase RapG regulator
	K06358: phrK; phosphatase RapK regulator
	K06359: rapA, spo0L; response regulator aspartate phosphatase A (stage 0 sporulation protein L) [EC:3.1.-.-]
	K06360: rapB; response regulator aspartate phosphatase B [EC:3.1.-.-]
	K06361: rapC; response regulator aspartate phosphatase C [EC:3.1.-.-]
	K06363: rapE; response regulator aspartate phosphatase E [EC:3.1.-.-]
	K06364: rapF; response regulator aspartate phosphatase F [EC:3.1.-.-]
	K06365: rapG; response regulator aspartate phosphatase G [EC:3.1.-.-]
	K06366: rapH; response regulator aspartate phosphatase H [EC:3.1.-.-]
	K06369: rapK; response regulator aspartate phosphatase K [EC:3.1.-.-]
	K06375: spo0B; stage 0 sporulation protein B (sporulation initiation phosphotransferase) [EC:2.7.-.-]
	K06998: phzF; trans-2,3-dihydro-3-hydroxyanthranilate isomerase [EC:5.3.3.17]
	K07173: luxS; S-ribosylhomocysteine lyase [EC:4.4.1.21]
	K07344: trbL; type IV secretion system protein TrbL
	K07645: qseC; two-component system, OmpR family, sensor histidine kinase QseC [EC:2.7.13.3]
	K07666: qseB; two-component system, OmpR family, response regulator QseB
	K07667: kdpE; two-component system, OmpR family, KDP operon response regulator KdpE
	K07680: comP; two-component system, NarL family, sensor histidine kinase ComP [EC:2.7.13.3]
	K07691: comA; two-component system, NarL family, competent response regulator ComA
	K07692: degU; two-component system, NarL family, response regulator DegU
	K07699: spo0A; two-component system, response regulator, stage 0 sporulation protein A
	K07706: agrC, blpH, fsrC; two-component system, LytTR family, sensor histidine kinase AgrC [EC:2.7.13.3]
	K07707: agrA, blpR, fsrA; two-component system, LytTR family, response regulator AgrA
	K07711: glrK, qseE; two-component system, NtrC family, sensor histidine kinase GlrK [EC:2.7.13.3]
	K07715: glrR, qseF; two-component system, NtrC family, response regulator GlrR
	K07781: rcsA; LuxR family transcriptional regulator, capsular biosynthesis positive transcription factor
	K07782: sdiA; LuxR family transcriptional regulator, quorum-sensing system regulator SdiA
	K07800: agrD; AgrD protein
	K07813: agrB; accessory gene regulator B
	K08321: lsrF; 3-hydroxy-5-phosphonooxypentane-2,4-dione thiolase [EC:2.3.1.245]
	K08605: gelE; coccolysin [EC:3.4.24.30]
	K08642: lasA; LasA protease [EC:3.4.24.-]
	K08777: nprB; neutral peptidase B [EC:3.4.24.-]
	K09823: zur; Fur family transcriptional regulator, zinc uptake regulator
	K09936: TC.BAT2; bacterial/archaeal transporter family-2 protein
	K10555: lsrB; AI-2 transport system substrate-binding protein
	K10556: lsrC; AI-2 transport system permease protein
	K10557: lsrD; AI-2 transport system permease protein
	K10558: lsrA, ego; AI-2 transport system ATP-binding protein
	K10715: rpfC; two-component system, sensor histidine kinase RpfC [EC:2.7.13.3]
	K10823: oppF; oligopeptide transport system ATP-binding protein
	K10909: luxQ; two-component system, autoinducer 2 sensor kinase/phosphatase LuxQ [EC:2.7.13.3 3.1.3.-]
	K10910: luxP; autoinducer 2-binding periplasmic protein LuxP
	K10911: luxU; two-component system, phosphorelay protein LuxU
	K10912: luxO; two-component system, repressor protein LuxO
	K10913: hapR, luxR, litR; TetR/AcrR family transcriptional regulator, hemagglutinin/protease regulatory prot
	K10914: crp; CRP/FNR family transcriptional regulator, cyclic AMP receptor protein
	K10915: cqsA; CAI-1 autoinducer synthase [EC:2.3.-.-]
	K10916: cqsS; two-component system, CAI-1 autoinducer sensor kinase/phosphatase CqsS [EC:2.7.13.3 3.1.3.-]
	K10917: aphA; PadR family transcriptional regulator, regulatory protein AphA
	K11006: stxA; shiga toxin subunit A
	K11007: stxB; shiga toxin subunit B
	K11031: slo; thiol-activated cytolysin
	K11033: nheA; non-hemolytic enterotoxin A
	K11034: nheBC; non-hemolytic enterotoxin B/C
	K11035: hblAB; hemolysin BL binding component
	K11036: hblC; hemolysin BL lytic component L2
	K11037: hblD; hemolysin BL lytic component L1
	K11039: hld; delta-hemolysin
	K11063: tcdAB; toxin A/B
	K11216: lsrK; autoinducer-2 kinase [EC:2.7.1.189]
	K11530: lsrG; (4S)-4-hydroxy-5-phosphonooxypentane-2,3-dione isomerase [EC:5.3.1.32]
	K11531: lsrR; lsr operon transcriptional repressor
	K11752: ribD; diaminohydroxyphosphoribosylaminopyrimidine deaminase / 5-amino-6-(5-phosphoribosylamino)uraci
	K12257: secDF; SecD/SecF fusion protein
	K12292: comA; ATP-binding cassette, subfamily C, bacterial, competence factor transporting protein [EC:3.4.2
	K12293: comB; competence factor transport accessory protein ComB
	K12294: comD; two-component system, LytTR family, sensor histidine kinase ComD [EC:2.7.13.3]
	K12295: comE; two-component system, LytTR family, response regulator ComE
	K12296: comX1_2; competence protein ComX
	K12415: comC; competence-stimulating peptide
	K12789: tccP; Tir-cytoskeleton coupling protein
	K12990: rfbF, rhlC; rhamnosyltransferase [EC:2.4.1.-]
	K13060: lasI; acyl homoserine lactone synthase [EC:2.3.1.184]
	K13061: rhlI, phzI, solI, cepI, tofI; acyl homoserine lactone synthase [EC:2.3.1.184]
	K13062: ainS, luxM; acyl homoserine lactone synthase [EC:2.3.1.184]
	K13063: phzE; 2-amino-4-deoxychorismate synthase [EC:2.6.1.86]
	K13075: ahlD, aiiA, attM, blcC; N-acyl homoserine lactone hydrolase [EC:3.1.1.81]
	K13815: rpfG; two-component system, response regulator RpfG
	K13816: rpfF; DSF synthase
	K14051: gmr; c-di-GMP phosphodiesterase Gmr [EC:3.1.4.52]
	K14645: K14645; serine protease [EC:3.4.21.-]
	K14982: ciaH; two-component system, OmpR family, sensor histidine kinase CiaH [EC:2.7.13.3]
	K14983: ciaR; two-component system, OmpR family, response regulator CiaR
	K15580: oppA, mppA; oligopeptide transport system substrate-binding protein
	K15581: oppB; oligopeptide transport system permease protein
	K15582: oppC; oligopeptide transport system permease protein
	K15583: oppD; oligopeptide transport system ATP-binding protein
	K15654: srfAA, lchAA; surfactin family lipopeptide synthetase A
	K15655: srfAB, lchAB; surfactin family lipopeptide synthetase B
	K15656: srfAC, lchAC; surfactin family lipopeptide synthetase C
	K15657: srfATE, srfAD, lchAD; external thioesterase TEII
	K15850: luxN; two-component system, autoinducer 1 sensor kinase/phosphatase LuxN [EC:2.7.13.3 3.1.3.-]
	K15851: qrr; quorum regulatory RNA Qrr
	K15852: luxR, vanR; LuxR family transcriptional regulator, transcriptional activator of the bioluminescence
	K15853: luxD; acyl transferase [EC:2.3.1.-]
	K15854: luxB; alkanal monooxygenase beta chain [EC:1.14.14.3]
	K16619: plc, cpa; phospholipase C / alpha-toxin [EC:3.1.4.3]
	K17940: pqsH; 2-heptyl-3-hydroxy-4(1H)-quinolone synthase [EC:1.14.13.182]
	K18000: pqsA; anthranilate-CoA ligase [EC:6.2.1.32]
	K18001: pqsB; 2-heptyl-4(1H)-quinolone synthase subunit PqsB [EC:2.3.1.230]
	K18002: pqsC; 2-heptyl-4(1H)-quinolone synthase subunit PqsC [EC:2.3.1.230]
	K18003: pqsD; anthraniloyl-CoA anthraniloyltransferase [EC:2.3.1.262]
	K18096: bjaI, rpaI, braI, rhiI; acyl-homoserine lactone synthase [EC:2.3.1.228 2.3.1.229 2.3.1.-]
	K18098: bjaR1, rpaR, rhiR; LuxR family transcriptional regulator, quorum-sensing system regulator BjaR1
	K18099: rhlR, phzR; LuxR family transcriptional regulator, quorum-sensing system regulator RhlR
	K18100: rhlA; rhamnosyltransferase subunit A [EC:2.4.1.-]
	K18101: rhlB; rhamnosyltransferase subunit B [EC:2.4.1.-]
	K18139: oprM, emhC, ttgC, cusC, adeK, smeF, mtrE, cmeC, gesC; outer membrane protein, multidrug efflux syste
	K18304: lasR; LuxR family transcriptional regulator, quorum-sensing system regulator LasR
	K18306: mexH; membrane fusion protein, multidrug efflux system
	K18307: mexI; multidrug efflux pump
	K18315: cpmC, carC; (5R)-carbapenem-3-carboxylate synthase [EC:1.14.20.3]
	K18316: cpmA, carA; carbapenam-3-carboxylate synthase [EC:6.3.3.6]
	K18317: cpmB, carB; carboxymethylproline synthase [EC:2.3.1.226]
	K18318: cpmD, carD; carbapenem biosynthesis protein, putative proline dehydrogenase [EC:1.5.-.-]
	K18319: cpmE, carE; carbapenem biosynthesis protein CpmE
	K19666: solR, cepR, tofR; LuxR family transcriptional regulator, quorum-sensing system regulator SolR
	K19731: cciR; LuxR family transcriptional regulator, quorum-sensing system regulator CciR
	K19732: traR; LuxR family transcriptional regulator, activator of conjugal transfer of Ti plasmids
	K19733: sinR, raiR, avsR; LuxR family transcriptional regulator, quorum-sensing system regulator SinR
	K19734: expR; LuxR family transcriptional regulator, quorum-sensing system regulator ExpR
	K19735: mvfR, pqsR; LysR family transcriptional regulator, quorum-sensing system regulator MvfR
	K20086: vioA; tryptophan oxidase VioA [EC:1.4.3.-]
	K20087: vioB; violacein biosynthesis protein VioB
	K20088: vioE; violacein biosynthesis protein VioE
	K20089: vioD; protodeoxyviolaceinate monooxygenase [EC:1.14.13.217]
	K20090: vioC; violacein synthase [EC:1.14.13.224]
	K20248: cinI; acyl homoserine lactone synthase [EC:2.3.1.184]
	K20249: raiI; acyl homoserine lactone synthase [EC:2.3.1.184]
	K20250: cciI; acyl homoserine lactone synthase [EC:2.3.1.184]
	K20252: cinR; LuxR family transcriptional regulator, quorum-sensing system regulator CinR
	K20253: bisR; LuxR family transcriptional regulator, quorum-sensing system regulator BisR
	K20256: luxG; flavin reductase [EC:1.-.-.-]
	K20257: pqsE; 2-aminobenzoylacetyl-CoA thioesterase [EC:3.1.2.32]
	K20258: lecA; PA-I galactophilic lectin
	K20259: lecB; PA-IIL fucose-binding lectin
	K20260: phzA_B; phenazine biosynthesis protein
	K20261: phzD; trans-2,3-dihydro-3-hydroxyanthranilic acid synthase [EC:3.3.2.15]
	K20262: phzG; dihydrophenazinedicarboxylate synthase [EC:1.10.3.16]
	K20263: fusK; two-component system, NarL family, sensor histidine kinase FusK [EC:2.7.13.3]
	K20264: fusR; two-component system, NarL family, response regulator FusR
	K20265: gadC; glutamate:GABA antiporter
	K20266: trbJ; type IV secretion system protein TrbJ
	K20267: trbH; type IV secretion system protein TrbH
	K20268: rhiA; rhizosphere induced protein
	K20269: rhiB; rhizosphere induced protein
	K20270: rhiC; rhizosphere induced protein
	K20271: accR; DeoR family transcriptional regulator, repressor of opine catabolism and conjugal transfer
	K20272: traM; TraR antiactivator
	K20273: zmpA; zinc metalloprotease ZmpA
	K20274: zmpB; zinc metalloprotease ZmpB
	K20275: aidA; nematocidal protein AidA
	K20276: bapA; large repetitive protein
	K20277: bcl; mannose-binding lectin
	K20321: nlmA; mutacin IV
	K20322: nlmB; mutacin IV
	K20323: nlmC, cipB; mutacin V
	K20324: nlmD; mutacin VI
	K20325: fhrR; TetR/AcrR family transcriptional regulator, Clp-modulated transcription factor
	K20326: xagA; protein XagA
	K20327: xagB; glycosyltransferase XagB
	K20328: xagC; membrane protein XagC
	K20329: qsmR; IclR family transcriptional regulator, positive regulator for flagellar biogenesis
	K20330: toxJ; LuxR family transcriptional regulator, activator of tox operons
	K20331: toxA; toxoflavin synthase [EC:2.1.1.349]
	K20332: toxC; toxoflavin biosynthesis protein ToxC
	K20333: toxD; toxoflavin biosynthesis protein ToxD
	K20334: cviR; LuxR family transcriptional regulator, quorum-sensing system regulator CviR
	K20335: psmA1_2; phenol-soluble modulin alpha 1/2
	K20336: psmA3; phenol-soluble modulin alpha 3
	K20337: psmB; phenol-soluble modulin beta
	K20338: rot; MarR family transcriptional regulator, global regulator for virulence
	K20339: agrC2; two-component system, LytTR family, sensor histidine kinase AgrC2 [EC:2.7.13.3]
	K20340: agrA2; two-component system, LytTR family, response regulator AgrA2
	K20341: blpL, cipI; immunity protein
	K20342: comR; HTH-type transcriptional regulator, regulator for ComX
	K20343: blpC; peptide pheromone BlpC
	K20344: blpA, lagD; ATP-binding cassette, subfamily C, bacteriocin exporter
	K20345: blpB; membrane fusion protein, peptide pheromone/bacteriocin exporter
	K20373: rgg2; HTH-type transcriptional regulator, SHP2-responsive activator
	K20374: rgg3; HTH-type transcriptional regulator, SHP3-responsive repressor
	K20375: ropB, rgg1; HTH-type transcriptional regulator, pheromone-responsive regulator
	K20376: prgQ; peptide inhibitor iCF10
	K20377: prgX; HTH-type transcriptional regulator, major conjugation operon repressor
	K20378: iad1; sex pheromone inhibitor iAD1
	K20379: cad; sex pheromone cAD1
	K20380: traA; HTH-type transcriptional regulator, pheromone-responsive repressor
	K20381: traE1; regulatory protein
	K20382: asa1; aggregation substance
	K20383: cylLL; CylL-L protein
	K20384: cylLS; CylL-S protein
	K20385: cylM; CylM protein
	K20386: cylB; ATP-binding cassette, subfamily B, bacterial CylB
	K20387: cylR1; regulatory protein CylR1
	K20388: cylR2; HTH-type transcriptional regulator, cytolysin regulator
	K20389: phrH; phosphatase RapH regulator
	K20390: papR; regulatory peptide PapR
	K20391: plcR; HTH-type transcriptional regulator, pleiotropic regulator of extracellular virulence genes
	K20480: nprR, nprA; HTH-type transcriptional regulator, quorum sensing regulator NprR
	K20481: nprX, nprRB; regulatory peptide NprX
	K20482: nisA, spaS, epiA; lantibiotic bacteriocin
	K20483: nisB, spaB, epiB; lantibiotic biosynthesis protein
	K20484: nisC, spaC, epiC; lantibiotic biosynthesis protein
	K20485: nisT, spaT; ATP-binding cassette, subfamily B, bacterial NisT
	K20486: nisP, epiP; lantibiotic leader peptide-processing serine protease [EC:3.4.21.-]
	K20487: nisK, spaK; two-component system, OmpR family, lantibiotic biosynthesis sensor histidine kinase NisK
	K20488: nisR, spaR; two-component system, OmpR family, lantibiotic biosynthesis response regulator NisR/SpaR
	K20489: nisI; lantibiotic immunity protein
	K20490: nisF, spaF, cprA, epiF; lantibiotic transport system ATP-binding protein
	K20491: nisE, spaE, cprB, epiE; lantibiotic transport system permease protein
	K20492: nisG, spaG, cprC; lantibiotic transport system permease protein
	K20494: epiG; lantibiotic transport system permease protein
	K20527: trbB; type IV secretion system protein TrbB [EC:7.4.2.8]
	K20528: trbC; type IV secretion system protein TrbC
	K20529: trbD; type IV secretion system protein TrbD
	K20530: trbE; type IV secretion system protein TrbE [EC:7.4.2.8]
	K20531: trbF; type IV secretion system protein TrbF
	K20532: trbG; type IV secretion system protein TrbG
	K20533: trbI; type IV secretion system protein TrbI
	K20539: blcR; IclR family transcriptional regulator, blcABC operon repressor
	K20540: cepR2; LuxR family transcriptional regulator, quorum-sensing system regulator CepR2
	K20552: ler; transcriptional regulator of LEE operons
	K20554: rnaIII; small regulatory RNA RNAIII
	K20555: trbK; type IV secretion system protein TrbK
	K22954: luxI; acyl homoserine lactone synthase [EC:2.3.1.184]
	K22955: traI, avsI; acyl homoserine lactone synthase [EC:2.3.1.184]
	K22956: expI, esaI; acyl homoserine lactone synthase [EC:2.3.1.184]
	K22957: cviI; acyl homoserine lactone synthase [EC:2.3.1.184]
	K22968: sinI, avsI; acyl homoserine lactone synthase [EC:2.3.1.184]
	K23133: comC; competence-stimulating peptide

## Sheet: KO05111
Pathway	KO05111
Description	Surface colonization and subsequent biofilm formation and development provide numerous advantages to microorganisms. On the other hand, biofilm formation is an energetically costly process and therefore must be tightly regulated and plastic, enabling biofilm bacteria to be responsive to the various environmental cues. The quorum sensing (QS) pathway of Vibrio cholerae activates the expression of …
Genes	K00640: cysE; serine O-acetyltransferase [EC:2.3.1.30]
	K01791: wecB; UDP-N-acetylglucosamine 2-epimerase (non-hydrolysing) [EC:5.1.3.14]
	K01912: paaK; phenylacetate-CoA ligase [EC:6.2.1.30]
	K02405: fliA; RNA polymerase sigma factor for flagellar operon FliA
	K02452: gspC; general secretion pathway protein C
	K02453: gspD; general secretion pathway protein D
	K02454: gspE; general secretion pathway protein E [EC:7.4.2.8]
	K02455: gspF; general secretion pathway protein F
	K02456: gspG; general secretion pathway protein G
	K02457: gspH; general secretion pathway protein H
	K02458: gspI; general secretion pathway protein I
	K02459: gspJ; general secretion pathway protein J
	K02460: gspK; general secretion pathway protein K
	K02461: gspL; general secretion pathway protein L
	K02462: gspM; general secretion pathway protein M
	K02463: gspN; general secretion pathway protein N
	K02472: wecC; UDP-N-acetyl-D-mannosaminuronic acid dehydrogenase [EC:1.1.1.336]
	K02777: PTS-Glc-EIIA, crr; PTS system, sugar-specific IIA component [EC:2.7.1.-]
	K02778: PTS-Glc-EIIB, ptsG; PTS system, glucose-specific IIB component [EC:2.7.1.199]
	K02779: PTS-Glc-EIIC, ptsG; PTS system, glucose-specific IIC component
	K03087: rpoS; RNA polymerase nonessential primary-like sigma factor
	K03092: rpoN; RNA polymerase sigma-54 factor
	K03557: fis; Fis family transcriptional regulator, factor for inversion stimulation protein
	K03563: csrA; carbon storage regulator
	K03606: wcaJ; putative colanic acid biosysnthesis UDP-glucose lipid carrier transferase
	K03666: hfq; host factor-I protein
	K05851: cyaA; adenylate cyclase, class 1 [EC:4.6.1.1]
	K05946: tagA, tarA; N-acetylglucosaminyldiphosphoundecaprenol N-acetyl-beta-D-mannosaminyltransferase [EC:2.
	K07173: luxS; S-ribosylhomocysteine lyase [EC:4.4.1.21]
	K07181: cdgJ; c-di-GMP phosphodiesterase [EC:3.1.4.52]
	K07678: barA, gacS, varS; two-component system, NarL family, sensor histidine kinase BarA [EC:2.7.13.3]
	K07689: uvrY, gacA, varA; two-component system, NarL family, invasion response regulator UvrY
	K08604: hap, nprV; vibriolysin [EC:3.4.24.25]
	K08720: ompU; outer membrane protein OmpU
	K10909: luxQ; two-component system, autoinducer 2 sensor kinase/phosphatase LuxQ [EC:2.7.13.3 3.1.3.-]
	K10910: luxP; autoinducer 2-binding periplasmic protein LuxP
	K10911: luxU; two-component system, phosphorelay protein LuxU
	K10912: luxO; two-component system, repressor protein LuxO
	K10913: hapR, luxR, litR; TetR/AcrR family transcriptional regulator, hemagglutinin/protease regulatory prot
	K10914: crp; CRP/FNR family transcriptional regulator, cyclic AMP receptor protein
	K10915: cqsA; CAI-1 autoinducer synthase [EC:2.3.-.-]
	K10916: cqsS; two-component system, CAI-1 autoinducer sensor kinase/phosphatase CqsS [EC:2.7.13.3 3.1.3.-]
	K10917: aphA; PadR family transcriptional regulator, regulatory protein AphA
	K10918: aphB; LysR family transcriptional regulator, transcriptional activator AphB
	K10919: tcpH; toxin coregulated pilus biosynthesis protein H
	K10920: tcpP; toxin coregulated pilus biosynthesis protein P
	K10921: toxR; cholera toxin transcriptional activator
	K10922: toxS; transmembrane regulatory protein ToxS
	K10923: tcpN, toxT; AraC family transcriptional regulator, TCP pilus virulence regulatory protein
	K10924: mshA; MSHA pilin protein MshA
	K10925: mshB; MSHA pilin protein MshB
	K10926: mshC; MSHA pilin protein MshC
	K10927: mshD; MSHA pilin protein MshD
	K10928: ctxA; cholera enterotoxin subunit A [EC:2.4.2.36]
	K10929: ctxB; cholera enterotoxin subunit B
	K10930: tcpA; toxin coregulated pilin
	K10931: tcpB; toxin coregulated pilus biosynthesis protein B
	K10932: tcpC; toxin coregulated pilus biosynthesis outer membrane protein C
	K10933: tcpD; toxin coregulated pilus biosynthesis protein D
	K10934: tcpE; toxin coregulated pilus biosynthesis protein E
	K10935: tcpF; toxin coregulated pilus biosynthesis protein F
	K10936: acfA; accessory colonization factor AcfA
	K10937: acfB; accessory colonization factor AcfB
	K10938: acfC; accessory colonization factor AcfC
	K10939: acfD; accessory colonization factor AcfD
	K10940: ompT; outer membrane protein OmpT
	K10941: fleQ, flrA; sigma-54 dependent transcriptional regulator, flagellar regulatory protein
	K10942: flrB, fleS; two-component system, sensor histidine kinase FlrB [EC:2.7.13.3]
	K10943: flrC, fleR; two-component system, response regulator FlrC
	K10961: tcpI; toxin coregulated pilus biosynthesis protein I
	K10962: tcpQ; toxin coregulated pilus biosynthesis protein Q
	K10963: tcpR; toxin coregulated pilus biosynthesis protein R
	K10964: tcpS; toxin coregulated pilus biosynthesis protein S
	K10965: tcpT; toxin coregulated pilus biosynthesis protein T
	K12276: mshE; MSHA biogenesis protein MshE
	K13246: vieA; c-di-GMP phosphodiesterase [EC:3.1.4.52]
	K15851: qrr; quorum regulatory RNA Qrr
	K16554: exoP, vpsO; polysaccharide biosynthesis transport protein
	K18515: csrB; small regulatory RNA CsrB
	K20918: vpsT; LuxR family transcriptional regulator, positive regulator of biofilm formation
	K20919: vpsR, cpsR; sigma-54 dependent transcriptional regulator, positive regulator of biofilm formation
	K20920: vpsM; polysaccharide biosynthesis protein VpsM
	K20921: vpsD, epsF; polysaccharide biosynthesis protein VpsD
	K20922: vpsI; polysaccharide biosynthesis protein VpsI
	K20945: vpsU; tyrosine-protein phosphatase [EC:3.1.3.48]
	K20946: vpsE; polysaccharide biosynthesis protein VpsE
	K20947: vpsF; polysaccharide biosynthesis protein VpsF
	K20948: vpsJ; polysaccharide biosynthesis protein VpsJ
	K20949: vpsP; polysaccharide biosynthesis protein VpsP
	K20950: vpsQ; polysaccharide biosynthesis protein VpsQ
	K20951: bap1; extracellular matrix protein
	K20952: rbmC; rugosity and biofilm structure modulator C
	K20953: rbmA; rugosity and biofilm structure modulator A
	K20954: acgB; diguanylate cyclase [EC:2.7.7.65]
	K20955: cdgK; diguanylate cyclase [EC:2.7.7.65]
	K20956: cdgA; diguanylate cyclase [EC:2.7.7.65]
	K20957: cdgH; diguanylate cyclase [EC:2.7.7.65]
	K20958: cdgL; diguanylate cyclase [EC:2.7.7.65]
	K20959: cdgM; diguanylate cyclase [EC:2.7.7.65]
	K20960: K20960; diguanylate cyclase [EC:2.7.7.65]
	K20961: vpvC; diguanylate cyclase [EC:2.7.7.65]
	K20962: cdgC; c-di-GMP phosphodiesterase [EC:3.1.4.52]
	K20963: acgA; c-di-GMP phosphodiesterase [EC:3.1.4.52]
	K20964: cdpA; c-di-GMP phosphodiesterase [EC:3.1.4.52]
	K20965: rocS; c-di-GMP phosphodiesterase [EC:3.1.4.52]
	K20966: mbaA; c-di-GMP phosphodiesterase [EC:3.1.4.52]
	K20988: vpsN; polysaccharide biosynthesis/export protein VpsN

## Sheet: KO02025
Pathway	KO02025
Description	Surface colonization and subsequent biofilm formation and development provide numerous advantages to microorganisms. The main key actors relevant in the regulation of biofilm formation by Pseudomonas aeruginosa include cAMP/Vfr signaling, quorum sensing (QS) systems, Gac/Rsm pathway, and c-di-GMP signaling. cAMP/Vfr signaling regulates the transcription of hundreds of genes encoding diverse virul…
Genes	K01657: trpE; anthranilate synthase component I [EC:4.1.3.27]
	K01658: trpG; anthranilate synthase component II [EC:4.1.3.27]
	K01768: E4.6.1.1; adenylate cyclase [EC:4.6.1.1]
	K02398: flgM; negative regulator of flagellin synthesis FlgM
	K02405: fliA; RNA polymerase sigma factor for flagellar operon FliA
	K02657: pilG; twitching motility two-component system response regulator PilG
	K02658: pilH; twitching motility two-component system response regulator PilH
	K02659: pilI; twitching motility protein PilI
	K02660: pilJ; twitching motility protein PilJ
	K03563: csrA; carbon storage regulator
	K03651: cpdA; 3',5'-cyclic-AMP phosphodiesterase [EC:3.1.4.53]
	K06596: chpA; chemosensory pili system protein ChpA (sensor histidine kinase/response regulator)
	K06598: chpC; chemosensory pili system protein ChpC
	K07678: barA, gacS, varS; two-component system, NarL family, sensor histidine kinase BarA [EC:2.7.13.3]
	K07689: uvrY, gacA, varA; two-component system, NarL family, invasion response regulator UvrY
	K10914: crp; CRP/FNR family transcriptional regulator, cyclic AMP receptor protein
	K10941: fleQ, flrA; sigma-54 dependent transcriptional regulator, flagellar regulatory protein
	K11444: wspR; two-component system, chemotaxis family, response regulator WspR [EC:2.7.7.65]
	K11890: impM; type VI secretion system protein ImpM
	K11891: impL, vasK, icmF; type VI secretion system protein ImpL
	K11893: impJ, vasE; type VI secretion system protein ImpJ
	K11895: impH, vasB; type VI secretion system protein ImpH
	K11900: impC; type VI secretion system protein ImpC
	K11901: impB; type VI secretion system protein ImpB
	K11902: impA; type VI secretion system protein ImpA
	K11903: hcp; type VI secretion system secreted protein Hcp
	K11907: vasG, clpV; type VI secretion system protein VasG
	K11912: ppkA; serine/threonine-protein kinase PpkA [EC:2.7.11.1]
	K11913: fha1; type VI secretion system protein
	K11915: stp1, pppA; serine/threonine protein phosphatase Stp1 [EC:3.1.3.16]
	K12990: rfbF, rhlC; rhamnosyltransferase [EC:2.4.1.-]
	K12992: rfbN; rhamnosyltransferase [EC:2.4.1.-]
	K13060: lasI; acyl homoserine lactone synthase [EC:2.3.1.184]
	K13061: rhlI, phzI, solI, cepI, tofI; acyl homoserine lactone synthase [EC:2.3.1.184]
	K13487: wspA; methyl-accepting chemotaxis protein WspA
	K13488: wspB; chemotaxis-related protein WspB
	K13489: wspD; chemotaxis-related protein WspD
	K13490: wspE; two-component system, chemotaxis family, sensor histidine kinase and response regulator WspE
	K13491: wspF; two-component system, chemotaxis family, response regulator WspF [EC:3.1.1.61]
	K16011: algA, xanB, rfbA, wbpW, pslB; mannose-1-phosphate guanylyltransferase / mannose-6-phosphate isomeras
	K17940: pqsH; 2-heptyl-3-hydroxy-4(1H)-quinolone synthase [EC:1.14.13.182]
	K18000: pqsA; anthranilate-CoA ligase [EC:6.2.1.32]
	K18001: pqsB; 2-heptyl-4(1H)-quinolone synthase subunit PqsB [EC:2.3.1.230]
	K18002: pqsC; 2-heptyl-4(1H)-quinolone synthase subunit PqsC [EC:2.3.1.230]
	K18003: pqsD; anthraniloyl-CoA anthraniloyltransferase [EC:2.3.1.262]
	K18099: rhlR, phzR; LuxR family transcriptional regulator, quorum-sensing system regulator RhlR
	K18100: rhlA; rhamnosyltransferase subunit A [EC:2.4.1.-]
	K18101: rhlB; rhamnosyltransferase subunit B [EC:2.4.1.-]
	K18304: lasR; LuxR family transcriptional regulator, quorum-sensing system regulator LasR
	K19291: alg44; mannuronan synthase [EC:2.4.1.33]
	K19735: mvfR, pqsR; LysR family transcriptional regulator, quorum-sensing system regulator MvfR
	K20257: pqsE; 2-aminobenzoylacetyl-CoA thioesterase [EC:3.1.2.32]
	K20258: lecA; PA-I galactophilic lectin
	K20259: lecB; PA-IIL fucose-binding lectin
	K20968: exsA; AraC family transcriptional regulator, exoenzyme S synthesis regulatory protein ExsA
	K20969: rsmY; small regulatory RNA RsmY
	K20970: rsmZ; small regulatory RNA RsmZ
	K20971: ladS; two-component system, sensor histidine kinase LadS
	K20972: retS; two-component system, sensor histidine kinase RetS
	K20973: sagS; two-component system, sensor histidine kinase SagS [EC:2.7.13.3]
	K20974: K20974; two-component system, sensor histidine kinase [EC:2.7.13.3]
	K20975: K20975; two-component system, sensor histidine kinase [EC:2.7.13.3]
	K20976: hptB; histidine phosphotransfer protein HptB
	K20977: hsbR; two-component system, HptB-dependent secretion and biofilm response regulator
	K20978: hsbA; HptB-dependent secretion and biofilm anti anti-sigma factor
	K20987: pslD; polysaccharide biosynthesis/export protein PslD
	K20997: pslA; polysaccharide biosynthesis protein PslA
	K20998: pslE; polysaccharide biosynthesis protein PslE
	K20999: pslF; polysaccharide biosynthesis protein PslF
	K21000: pslG; polysaccharide biosynthesis protein PslG
	K21001: pslH; polysaccharide biosynthesis protein PslH
	K21002: pslI; polysaccharide biosynthesis protein PslI
	K21003: pslJ; polysaccharide biosynthesis protein PslJ
	K21004: pslK; polysaccharide biosynthesis protein PslK
	K21005: pslL; polysaccharide biosynthesis protein PslL
	K21006: pelA; polysaccharide biosynthesis protein PelA
	K21007: pelB; polysaccharide biosynthesis protein PelB
	K21008: pelC; polysaccharide biosynthesis protein PelC
	K21009: pelD; polysaccharide biosynthesis protein PelD
	K21010: pelE; polysaccharide biosynthesis protein PelE
	K21011: pelF; polysaccharide biosynthesis protein PelF
	K21012: pelG; polysaccharide biosynthesis protein PelG
	K21019: sadC; diguanylate cyclase [EC:2.7.7.65]
	K21020: siaD; diguanylate cyclase [EC:2.7.7.65]
	K21021: tpbB; diguanylate cyclase [EC:2.7.7.65]
	K21022: roeA; diguanylate cyclase [EC:2.7.7.65]
	K21023: mucR; diguanylate cyclase [EC:2.7.7.65]
	K21024: bifA; c-di-GMP phosphodiesterase [EC:3.1.4.52]
	K21025: fimX; multidomain signaling protein FimX
	K23127: fimW; cyclic-di-GMP-binding protein

## Sheet: KO02026
Pathway	KO02026
Description	Bacteria inhabiting a biofilm are protected from physical stress, antimicrobials, and the host immune system, and thereby cause severe medical, environmental, and technical problems. Biofilm formation in Escherichia coli is regulated by two inversely controlled transcriptional feedforward cascades, the FlhDC/FliA cascade and the sigmaS/MlrA/CsgD cascade, which are active in post-exponentially gro…
Genes	K00688: PYG, glgP; glycogen phosphorylase [EC:2.4.1.1]
	K00694: bcsA; cellulose synthase (UDP-forming) [EC:2.4.1.12]
	K00703: glgA; starch synthase [EC:2.4.1.21]
	K00975: glgC; glucose-1-phosphate adenylyltransferase [EC:2.7.7.27]
	K01991: wza, gfcE; polysaccharide biosynthesis/export protein
	K02398: flgM; negative regulator of flagellin synthesis FlgM
	K02402: flhC; flagellar transcriptional activator FlhC
	K02403: flhD; flagellar transcriptional activator FlhD
	K02405: fliA; RNA polymerase sigma factor for flagellar operon FliA
	K02425: fliZ; regulator of sigma S factor FliZ
	K02777: PTS-Glc-EIIA, crr; PTS system, sugar-specific IIA component [EC:2.7.1.-]
	K03087: rpoS; RNA polymerase nonessential primary-like sigma factor
	K03563: csrA; carbon storage regulator
	K03566: gcvA; LysR family transcriptional regulator, glycine cleavage system transcriptional activator
	K03567: gcvR; glycine cleavage system transcriptional repressor
	K04333: csgD; LuxR family transcriptional regulator, csgAB operon transcriptional regulatory protein
	K04334: csgA; major curlin subunit
	K04335: csgB; minor curlin subunit
	K04336: csgC; curli production protein
	K04761: oxyR; LysR family transcriptional regulator, hydrogen peroxide-inducible genes activator
	K05851: cyaA; adenylate cyclase, class 1 [EC:4.6.1.1]
	K06204: dksA; DnaK suppressor protein
	K07173: luxS; S-ribosylhomocysteine lyase [EC:4.4.1.21]
	K07638: envZ; two-component system, OmpR family, osmolarity sensor histidine kinase EnvZ [EC:2.7.13.3]
	K07648: arcB; two-component system, OmpR family, aerobic respiration control sensor histidine kinase ArcB [E
	K07659: ompR; two-component system, OmpR family, phosphate regulon response regulator OmpR
	K07676: rcsD; two-component system, NarL family, sensor histidine kinase RcsD [EC:2.7.13.3]
	K07677: rcsC; two-component system, NarL family, capsular synthesis sensor histidine kinase RcsC [EC:2.7.13.
	K07678: barA, gacS, varS; two-component system, NarL family, sensor histidine kinase BarA [EC:2.7.13.3]
	K07687: rcsB; two-component system, NarL family, captular synthesis response regulator RcsB
	K07689: uvrY, gacA, varA; two-component system, NarL family, invasion response regulator UvrY
	K07773: arcA; two-component system, OmpR family, aerobic respiration control protein ArcA
	K07781: rcsA; LuxR family transcriptional regulator, capsular biosynthesis positive transcription factor
	K07782: sdiA; LuxR family transcriptional regulator, quorum-sensing system regulator SdiA
	K10914: crp; CRP/FNR family transcriptional regulator, cyclic AMP receptor protein
	K11531: lsrR; lsr operon transcriptional repressor
	K11931: pgaB; poly-beta-1,6-N-acetyl-D-glucosamine N-deacetylase [EC:3.5.1.-]
	K11935: pgaA; biofilm PGA synthesis protein PgaA
	K11936: pgaC, icaA; poly-beta-1,6-N-acetyl-D-glucosamine synthase [EC:2.4.1.-]
	K11937: pgaD; biofilm PGA synthesis protein PgaD
	K12687: flu; antigen 43
	K14051: gmr; c-di-GMP phosphodiesterase Gmr [EC:3.1.4.52]
	K18502: dsrA; small regulatory RNA DsrA
	K18504: arcZ; small regulatory RNA ArcZ
	K18509: rydC; small regulatory RNA RydC
	K18515: csrB; small regulatory RNA CsrB
	K18516: csrC; small regulatory RNA CsrC
	K18518: rprA; small regulatory RNA RprA
	K18521: gcvB; small regulatory RNA GcvB
	K18522: omrA, rygA; small regulatory RNA OmrA
	K18523: omrB, rygB; small regulatory RNA OmrB
	K18528: oxyS; small regulatory RNA OxyS
	K18968: adrA; diguanylate cyclase [EC:2.7.7.65]
	K21084: yegE; diguanylate cyclase [EC:2.7.7.65]
	K21085: yedQ; diguanylate cyclase [EC:2.7.7.65]
	K21086: yhjH; c-di-GMP phosphodiesterase [EC:3.1.4.52]
	K21087: ycgR; flagellar brake protein
	K21088: ydaM; diguanylate cyclase [EC:2.7.7.65]
	K21089: mlrA; MerR family transcriptional regulator, activator of the csg genes
	K21090: adrB; c-di-GMP phosphodiesterase [EC:3.1.4.52]
	K21091: mcaS; small regulatory RNA McaS

## Sheet: KO02030
Pathway	KO02030
Description	Chemotaxis is the process by which cells sense chemical gradients in their environment and then move towards more favorable conditions. In chemotaxis, events at the receptors control autophosphorylation of the CheA histidine kinase, and the phosphohistidine is the substrate for the response regulator CheY, which catalyzes the transfer of the phosphoryl group to a conserved aspartate. The resultin…
Genes	K00575: cheR; chemotaxis protein methyltransferase CheR [EC:2.1.1.80]
	K02410: fliG; flagellar motor switch protein FliG
	K02416: fliM; flagellar motor switch protein FliM
	K02417: fliNY, fliN; flagellar motor switch protein FliN/FliY
	K02556: motA; chemotaxis protein MotA
	K02557: motB; chemotaxis protein MotB
	K03406: mcp; methyl-accepting chemotaxis protein
	K03407: cheA; two-component system, chemotaxis family, sensor kinase CheA [EC:2.7.13.3]
	K03408: cheW; purine-binding chemotaxis protein CheW
	K03409: cheX; chemotaxis protein CheX
	K03410: cheC; chemotaxis protein CheC
	K03411: cheD; chemotaxis protein CheD [EC:3.5.1.44]
	K03412: cheB; two-component system, chemotaxis family, protein-glutamate methylesterase/glutaminase [EC:3.1.
	K03413: cheY; two-component system, chemotaxis family, chemotaxis protein CheY
	K03414: cheZ; chemotaxis protein CheZ
	K03415: cheV; two-component system, chemotaxis family, chemotaxis protein CheV
	K03776: aer; aerotaxis receptor
	K05874: tsr; methyl-accepting chemotaxis protein I, serine sensor receptor
	K05875: tar; methyl-accepting chemotaxis protein II, aspartate sensor receptor
	K05876: trg; methyl-accepting chemotaxis protein III, ribose and galactose sensor receptor
	K05877: tap; methyl-accepting chemotaxis protein IV, peptide sensor receptor
	K10108: malE; maltose/maltodextrin transport system substrate-binding protein
	K10439: rbsB; ribose transport system substrate-binding protein
	K10540: mglB; methyl-galactoside transport system substrate-binding protein
	K12368: dppA; dipeptide transport system substrate-binding protein
	K13924: cheBR; two-component system, chemotaxis family, CheB/CheR fusion protein [EC:2.1.1.80 3.1.1.61]

## Sheet: KO02040
Pathway	KO02040
Description	Cellular Processes; Cell motility
Genes	K02386: flgA; flagella basal body P-ring formation protein FlgA
	K02387: flgB; flagellar basal-body rod protein FlgB
	K02388: flgC; flagellar basal-body rod protein FlgC
	K02389: flgD; flagellar basal-body rod modification protein FlgD
	K02390: flgE; flagellar hook protein FlgE
	K02391: flgF; flagellar basal-body rod protein FlgF
	K02392: flgG; flagellar basal-body rod protein FlgG
	K02393: flgH; flagellar L-ring protein precursor FlgH
	K02394: flgI; flagellar P-ring protein precursor FlgI
	K02396: flgK; flagellar hook-associated protein 1 FlgK
	K02397: flgL; flagellar hook-associated protein 3 FlgL
	K02398: flgM; negative regulator of flagellin synthesis FlgM
	K02399: flgN; flagella synthesis protein FlgN
	K02400: flhA; flagellar biosynthesis protein FlhA
	K02401: flhB; flagellar biosynthetic protein FlhB
	K02402: flhC; flagellar transcriptional activator FlhC
	K02403: flhD; flagellar transcriptional activator FlhD
	K02405: fliA; RNA polymerase sigma factor for flagellar operon FliA
	K02406: fliC; flagellin
	K02407: fliD; flagellar hook-associated protein 2
	K02408: fliE; flagellar hook-basal body complex protein FliE
	K02409: fliF; flagellar M-ring protein FliF
	K02410: fliG; flagellar motor switch protein FliG
	K02411: fliH; flagellar assembly protein FliH
	K02412: fliI; flagellum-specific ATP synthase [EC:7.4.2.8]
	K02413: fliJ; flagellar FliJ protein
	K02414: fliK; flagellar hook-length control protein FliK
	K02416: fliM; flagellar motor switch protein FliM
	K02417: fliNY, fliN; flagellar motor switch protein FliN/FliY
	K02418: fliOZ, fliO; flagellar protein FliO/FliZ
	K02419: fliP; flagellar biosynthetic protein FliP
	K02420: fliQ; flagellar biosynthetic protein FliQ
	K02421: fliR; flagellar biosynthetic protein FliR
	K02422: fliS; flagellar protein FliS
	K02423: fliT; flagellar protein FliT
	K02556: motA; chemotaxis protein MotA
	K02557: motB; chemotaxis protein MotB
	K13820: fliR-flhB; flagellar biosynthetic protein FliR/FlhB
	K21217: motX; sodium-type polar flagellar protein MotX
	K21218: motY; sodium-type flagellar protein MotY

## Sheet: KO04810
Pathway	KO04810
Description	Cellular Processes; Cell motility
Genes	K00889: PIP5K; 1-phosphatidylinositol-4-phosphate 5-kinase [EC:2.7.1.68]
	K00907: MYLK; myosin-light-chain kinase [EC:2.7.11.18]
	K00920: PIP4K2; 1-phosphatidylinositol-5-phosphate 4-kinase [EC:2.7.1.149]
	K00921: PIKFYVE, FAB1; 1-phosphatidylinositol-3-phosphate 5-kinase [EC:2.7.1.150]
	K00922: PIK3CA_B_D; phosphatidylinositol-4,5-bisphosphate 3-kinase catalytic subunit alpha/beta/delta [EC:2.
	K01313: F2; coagulation factor II (thrombin) [EC:3.4.21.5]
	K02085: APC; adenomatosis polyposis coli protein
	K02649: PIK3R1_2_3; phosphoinositide-3-kinase regulatory subunit alpha/beta/delta
	K02833: HRAS; GTPase HRas
	K03099: SOS; son of sevenless
	K03898: KNG, BK; kininogen
	K03914: F2R, PAR1; coagulation factor II (thrombin) receptor
	K03915: BDKRB1; bradykinin receptor B1
	K03916: BDKRB2; bradykinin receptor B2
	K04129: CHRM1; muscarinic acetylcholine receptor M1
	K04130: CHRM2; muscarinic acetylcholine receptor M2
	K04131: CHRM3; muscarinic acetylcholine receptor M3
	K04132: CHRM4; muscarinic acetylcholine receptor M4
	K04133: CHRM5; muscarinic acetylcholine receptor M5
	K04189: CXCR4, CD184; C-X-C chemokine receptor type 4
	K04275: LPAR4, GPR23; lysophosphatidic acid receptor 4
	K04289: LPAR1, EDG2; lysophosphatidic acid receptor 1
	K04291: LPAR2, EDG4; lysophosphatidic acid receptor 2
	K04346: GNA12; guanine nucleotide-binding protein subunit alpha-12
	K04347: GNG12; guanine nucleotide-binding protein G(I)/G(S)/G(O) subunit gamma-12
	K04357: EGF; epidermal growth factor
	K04358: FGF; fibroblast growth factor
	K04359: PDGFA; platelet-derived growth factor subunit A
	K04361: EGFR, ERBB1; epidermal growth factor receptor [EC:2.7.10.1]
	K04362: FGFR1, CD331; fibroblast growth factor receptor 1 [EC:2.7.10.1]
	K04363: PDGFRA, CD140A; platelet-derived growth factor receptor alpha [EC:2.7.10.1]
	K04365: BRAF; B-Raf proto-oncogene serine/threonine-protein kinase [EC:2.7.11.1]
	K04366: RAF1; RAF proto-oncogene serine/threonine-protein kinase [EC:2.7.11.1]
	K04367: MOS; proto-oncogene serine/threonine-protein kinase mos [EC:2.7.11.1]
	K04368: MAP2K1, MEK1; mitogen-activated protein kinase kinase 1 [EC:2.7.12.2]
	K04369: MAP2K2, MEK2; mitogen-activated protein kinase kinase 2 [EC:2.7.12.2]
	K04371: ERK, MAPK1_3; mitogen-activated protein kinase 1/3 [EC:2.7.11.24]
	K04392: RAC1; Ras-related C3 botulinum toxin substrate 1
	K04393: CDC42; cell division control protein 42
	K04409: PAK1; p21-activated kinase 1 [EC:2.7.11.1]
	K04410: PAK2; p21-activated kinase 2 [EC:2.7.11.1]
	K04438: CRK, CRKII; proto-oncogene C-crk
	K04513: RHOA; Ras homolog gene family, member A
	K04514: ROCK1; Rho-associated protein kinase 1 [EC:2.7.11.1]
	K04526: INS; insulin
	K04639: GNA13; guanine nucleotide-binding protein subunit alpha-13
	K05086: INSRR; insulin receptor-related receptor [EC:2.7.10.1]
	K05089: PDGFRB, CD140B; platelet-derived growth factor receptor beta [EC:2.7.10.1]
	K05093: FGFR2, CD332; fibroblast growth factor receptor 2 [EC:2.7.10.1]
	K05094: FGFR3, CD333; fibroblast growth factor receptor 3 [EC:2.7.10.1]
	K05095: FGFR4, CD334; fibroblast growth factor receptor 4 [EC:2.7.10.1]
	K05450: PDGFC_D; platelet derived growth factor C/D
	K05627: BAIAP2, IRSP53; BAI1-associated protein 2
	K05692: ACTB_G1; actin beta/gamma 1
	K05699: ACTN1_4; actinin alpha 1/4
	K05700: VCL; vinculin
	K05704: SRC; tyrosine-protein kinase Src [EC:2.7.10.2]
	K05717: FN1; fibronectin 1
	K05718: ITGAL, CD11a; integrin alpha L
	K05719: ITGB1, CD29; integrin beta 1
	K05720: FGD1; FYVE, RhoGEF and PH domain containing 1
	K05722: FGD3; FYVE, RhoGEF and PH domain containing 3
	K05725: PTK2, FAK; focal adhesion kinase 1 [EC:2.7.10.2]
	K05726: BCAR1, CAS; breast cancer anti-estrogen resistance 1
	K05729: ARHGEF6, PIXA; Rho guanine nucleotide exchange factor 6
	K05730: VAV; guanine nucleotide exchange factor VAV
	K05731: TIAM1; T-lymphoma invasion and metastasis-inducing protein 1
	K05732: ARHGAP35, GRLF1; glucocorticoid receptor DNA-binding factor 1
	K05733: PAK3, MRX30; p21-activated kinase 3 [EC:2.7.11.1]
	K05734: PAK4; p21-activated kinase 4 [EC:2.7.11.1]
	K05735: PAK6; p21-activated kinase 6 [EC:2.7.11.1]
	K05736: PAK5, PAK7; p21-activated kinase 5 [EC:2.7.11.1]
	K05737: GIT1; G protein-coupled receptor kinase interactor 1
	K05740: DIAPH1; diaphanous 1
	K05741: DIAPH2; diaphanous 2
	K05742: SLC9A1, NHE1; solute carrier family 9 (sodium/hydrogen exchanger), member 1
	K05743: LIMK1; LIM domain kinase 1 [EC:2.7.11.1]
	K05744: LIMK2; LIM domain kinase 2 [EC:2.7.11.1]
	K05745: DIAPH3, DRF3; diaphanous 3
	K05746: ENAH, MENA; enabled
	K05747: WAS; Wiskott-Aldrich syndrome protein
	K05748: WASF2; WAS protein family, member 2
	K05749: CYFIP; cytoplasmic FMR1 interacting protein
	K05750: NCKAP1, NAP125; NCK-associated protein 1
	K05751: ABI2; abl interactor 2
	K05752: C3ORF10, HSPC300; chromosome 3 open reading frame 10
	K05753: WASF1; WAS protein family, member 1
	K05754: ARPC5; actin related protein 2/3 complex, subunit 5
	K05755: ARPC4; actin related protein 2/3 complex, subunit 4
	K05756: ARPC3; actin related protein 2/3 complex, subunit 3
	K05757: ARPC1A_B; actin related protein 2/3 complex, subunit 1A/1B
	K05758: ARPC2; actin related protein 2/3 complex, subunit 2
	K05759: PFN; profilin
	K05760: PXN; paxillin
	K05762: RDX; radixin
	K05763: MSN; moesin
	K05764: TMSB4; thymosin, beta 4
	K05765: CFL; cofilin
	K05766: SSH; protein phosphatase slingshot [EC:3.1.3.16 3.1.3.48]
	K05767: IQGAP2_3; Ras GTPase-activating-like protein IQGAP2/3
	K05768: GSN; gelsolin
	K05769: ARHGEF4_29, ASEF1_2; Rho guanine nucleotide exchange factor 4/29
	K06269: PPP1C; serine/threonine-protein phosphatase PP1 catalytic subunit [EC:3.1.3.16]
	K06270: PPP1R12A, MYPT1; protein phosphatase 1 regulatory subunit 12A
	K06461: ITGAM, CD11b; integrin alpha M
	K06462: ITGAX, CD11c; integrin alpha X
	K06464: ITGB2, CD18; integrin beta 2
	K06476: ITGA2B, CD41; integrin alpha 2B
	K06480: ITGA1, CD49a; integrin alpha 1
	K06481: ITGA2, CD49b; integrin alpha 2
	K06482: ITGA3, CD49c; integrin alpha 3
	K06483: ITGA4, CD49d; integrin alpha 4
	K06484: ITGA5, CD49e; integrin alpha 5
	K06485: ITGA6, CD49f; integrin alpha 6
	K06487: ITGAV, CD51; integrin alpha V
	K06493: ITGB3, CD61; integrin beta 3
	K06524: ITGAE, CD103; integrin alpha E
	K06525: ITGB4, CD104; integrin beta 4
	K06583: ITGA7; integrin alpha 7
	K06584: ITGA8; integrin alpha 8
	K06585: ITGA9; integrin alpha 9
	K06586: ITGA10; integrin alpha 10
	K06587: ITGA11; integrin alpha 11
	K06588: ITGB5; integrin beta 5
	K06589: ITGB6; integrin beta 6
	K06590: ITGB7; integrin beta 7
	K06591: ITGB8; integrin beta 8
	K06594: ITGAD, CD11d; integrin alpha D
	K07532: ARHGEF12, LARG; Rho guanine nucleotide exchange factor 12
	K07827: KRAS, KRAS2; GTPase KRas
	K07828: NRAS; GTPase NRas
	K07829: RRAS; Ras-related protein R-Ras
	K07830: RRAS2, TC21; Ras-related protein R-Ras2
	K07831: MRAS; Ras-related protein M-Ras
	K07860: RAC2; Ras-related C3 botulinum toxin substrate 2
	K07861: RAC3; Ras-related C3 botulinum toxin substrate 3
	K08007: VIL2; villin 2 (ezrin)
	K08390: LPAR5, GPR92; lysophosphatidic acid receptor 5
	K08845: ARAF, ARAF1; A-Raf proto-oncogene serine/threonine-protein kinase [EC:2.7.11.1]
	K10031: CXCL12; C-X-C motif chemokine 12
	K10351: MYL2; myosin regulatory light chain 2
	K12329: PPP1R12B, MYPT2; protein phosphatase 1 regulatory subunit 12B
	K12330: ARHGEF1; Rho guanine nucleotide exchange factor 1
	K12753: MYL5; myosin regulatory light chain 5
	K12754: MYL7; myosin regulatory light chain 7
	K12755: MYL9; myosin regulatory light chain 9
	K12756: MYL10; myosin regulatory light chain 10
	K12757: MYL12; myosin regulatory light chain 12
	K12758: MYLPF; fast skeletal myosin light chain 2
	K13708: DOCK1; dedicator of cytokinesis protein 1
	K13710: ARHGEF7, PIXB; Rho guanine nucleotide exchange factor 7
	K16848: IQGAP1; Ras GTPase-activating-like protein IQGAP1
	K17386: PDGFB; platelet-derived growth factor subunit B
	K17388: ROCK2; Rho-associated protein kinase 2 [EC:2.7.11.1]
	K17457: PPP1R12C, MBS85; protein phosphatase 1 regulatory subunit 12C
	K18496: FGF1; fibroblast growth factor 1
	K18497: FGF2; fibroblast growth factor 2
	K22428: FGF23; fibroblast growth factor 23
	K22429: FGF21; fibroblast growth factor 21
	K22603: FGF19; fibroblast growth factor 19
